# Supplementary material
Source: PubMed Central journal article supplement (PMC4083121)

## **Supplementary Figure Legends**

**Supplementary Figure 1 - Cell-Specific Labeling With Amino Acid Precursors.** **a)** *meso*-2,6-Diaminopimelate (DAP) and *D*-lysine are *L*-lysine precursors that can not be metabolized by eukaryotic cells. Diaminopimelate Decarboxylase (DDC) (PDB: 2QGH) and Lysine Racemase (Lyr) (PDB: 4DZA) are non-mammalian amino acid processing enzymes that can specifically convert their respective amino acid precursors into functional *L*-amino acids. **b)** Conceptually, eukaryotic cells transfected with DDC and Lyr exclusively proliferate on DAP and *D*-lysine respectively. When grown on “Light” DAP and “Heavy” (+8 Da) *D*-lysine, +DDC and +Lyr cells maintain proteomic labeling fidelity in a proliferating co-culture. However, the fidelity of this labeling technique is directly dependent on the performance of DDC and Lyr amino acid processing enzymes. **c)** Optimal DDC and Lyr enzymes should: 1) Confer excellent precursor-specific proliferation, 2) retain the enzymes intracellularly, 3) be applicable to multiple cell types, 4) avoid transcriptional cell stress and 5) facilitate continuous co-culture experiments.

**Supplementary Figure 2 - Structural Variation Between DDC Enzymes.** **a)** DDC from *Helicobacter pylori* (PDB: 2QGH) (Green), *Methanocaldococcus jannaschii* (PDB: 1TUF) (Blue) and *Mycobacterium tuberculosis* (PDB: 1HKW) (Red). We hypothesized that screening structurally distinct DDC orthologs would help identify an improved DDC enzyme for use in cell-specific labeling with amino acid precursors. For example, as DDC is catalytically active as a homodimer, we hypothesized that different quaternary structures could affect ectopic DDC activity in mammalian cells. As a result, we screened DDC enzymes that form distinct quaternary crystals: DDC from *H. pylori* crystallizes as a monomer, whereas DDC from *M. jannaschii* and *M. tuberculosis* form homodimers. In contrast, *M. tuberculosis* DDC forms a covalent homodimer through a disulphide bridge between Cys93 and Cys375 (Yellow). **b)** We also hypothesized that variations in active site access could alter ectopic DDC activity in mammalian cells. Each of the screened DDC enzymes has a distinct “Active-Site Loop” responsible for controlling access to the DDC catalytic site (indicated by lysine (Green) and PLP (Magenta)).

**Supplementary Figure 3 - Enzyme Leader Sequences.** SignalP 4.1 analysis of **a)** DDC and **b)** Lyr amino-terminal sequences. Predictive C-Score (raw cleave site score) (red), S-Score (signal peptide score) (green) and Y-Score (combined cleavage site score) (blue) are shown. High S-scores suggest a signal sequence is present and high C/Y-Scores predict potential cleavage sites. Wild-type Lyr (Lyr<sup>WT</sup>) contains a predicted signal peptide (amino acids 1-30) and several cleavage motifs. “Modified Lyr” also contains potential signal elements although this is less pronounced than Lyr<sup>WT</sup>. In contrast, Lyr<sup>M37</sup> shows no evidence of a signal sequence motif. In addition, no DDC enzymes contain predicted signal peptide motifs.

**Supplementary Figure 4 - GFP<sup>+</sup> and RFP<sup>+</sup> Co-Culture FACS.** **a)** 10 day MDA-MB-231 / C3H10T1/2 co-cultures were sorted by their GFP and RFP expression. DAPI was used to distinguish between live and dead cells. **b)** Post-FACS cell populations were re-analyzed for GFP<sup>+</sup> and RFP<sup>+</sup> purity.

**Supplementary Figure 5 - Selected Reaction Monitoring (SRM) of Lyr and DDC.** **a)** Unscheduled SRM of proteotypic Lyr peptides from C3H10T1/2 cells transfected with either empty vector, Lyr<sup>M37-KDEL</sup> or DDC<sup>M.tub-KDEL</sup>. Proteotypic Lyr product ion transitions are only detected in cells transfected with Lyr<sup>M37-KDEL</sup>. **b)** Unscheduled SRM of proteotypic DDC<sup>M.tub</sup> peptides from C3H10T1/2 cells transfected with either empty vector, Lyr<sup>M37-KDEL</sup> or DDC<sup>M.tub-KDEL</sup>. Proteotypic DDC<sup>M.tub</sup> product ion transitions are only detected in cells transfected with DDC<sup>M.tub-KDEL</sup>.

**Supplementary Data - Figure 3b.** Proteome Discoverer 1.4 grouped peptide view of data from Figure 3b.

**Supplementary Data - Figure 4c.** Proteome Discoverer 1.4 grouped peptide view of data from Figure 4c.

## Annotated Enzyme Sequences

```

A.thaliana      MAAATQFLSQPSSLNPHQLKNQTSQRSRSIPVLSLKSTLKPLKRLSVKAAVVSQNSSKTV 60
H.pylori        -----M 1
M.jannaschii    -----MKIMFLG-----NDTVEIKDGRFFI 20
M.tuberculosis  -----MNELLHLAPNVVPRNTRDEVGVCV 26
M.leprae        -----MNVHTAGPRHAEKTRHTATPQRVQPSDDLRLASNWVPRNITRDETVGACI 51
M.avium         -----MNVHPAGPRHAETRHPEPPRPQSPPEELLLLAPNVVPRNATRNEAGVATI 51
:
A.thaliana      TKFDHCFKSSDGLFYCEGTVKVEDIMESVERRPFYLYSKPQITRNLEAYKEALE----- 114
H.pylori        FNYEELFQT-----HKTPFYLYDFDKIKQAFLLNYKEAFK----- 35
M.jannaschii    DGYDAIELAEEK-----FGTPLYVMSEEQIKINYNRYIEAFKRWEEET 62
M.tuberculosis  AGIPLTQLAQ-----EYGTPLFVIDEDDFRSRCREIAAFAFG----- 62
M.leprae        AGNKLTDLAG-----EYGTPLFVIDEDDFRFRCREIAAFAFG----- 87
M.avium         AGVAVTELAR-----EYGTPLFVDEDDFRSRCREIASAFG----- 87
:
A.thaliana      GVSSVIGYAIKANNLKIHLRSLGCGAVLVSGNELRLALRAGFDPTKCIFNGNGKSLE 174
H.pylori        GRKSLICYALKANSNLSILSLLAHLESADCVSIGEIQRALKAGIKPYRIVFSGVGSFAF 95
M.jannaschii    GKEFIVAYAYKANANLAITRLLAKLGCADVVSGGELYIAKLSNVPSKKIVFNGNCKTKE 122
M.tuberculosis  -SGANVHYAAKAFLCSEVARWISSEGLCLDVCTGGELAVALHASFPFERITLHGNNKSVS 121
M.leprae        -GGENVHYAAKAFLCETEARWIDEGLSLDVCTGGELAVALHASFPFERISLHGNNKSV 146
M.avium         -GGNVHYAAKAFLCSEVARWIDEGLSLDVCTGGELAVALHADFPFERITFHGNNKSV 146
:
A.thaliana      DLVLAQEG-VFVNVDSFEDLNNIVEASRISGKQVNVLLRINPDVDPQVHPVATGNKNS 233
H.pylori        EIEQALKLNILFLNVEFMEKLTETIAQSLGKARISIRINPNIDAKTHPYISTGLKEN 155
M.jannaschii    EIIMGIEANIRAFNVDSISELLINETAKELGETANVAFRINPNVNPKTHPKISTGLKKN 182
M.tuberculosis  ELTAAVKAGVGHIVVDSMTEIERLDAIAGEAGIQDVLVRLTVGVEAHTHEFISTAHEDQ 181
M.leprae        ELKDAVKAGVGYIVLDSSTEIERLDAIAGEAGIQDVLVRLTVGVEAHTHEFIATAHEDQ 206
M.avium         ELTAAVKAGVGHVVDLSMTEIERLDAIADAGIVQDVVRLTVGVEAHTHEFISTAHEDQ 206
:
A.thaliana      KFGIR-NEKLQWFLDQVKAHPKELKLVGAHCHLGSITTKVDIFRDAAVLMIEYIDEIR-- 290
H.pylori        KFGVGEKEALEMFLWAKKS--AFLEPVSVHFHIGSQLLDLEPIEASQVAKIAKSLI-- 211
M.jannaschii    KFGLDVESGIAMKAIKMALEMEYVNVVGVCHIGSQLTDISPFIEETRVKMDVFVELK-- 240
M.tuberculosis  KFGLSVAGSAAVAARRVVFATDHLRLVGLHSHIGSQIFDVGDFELAAHRVIGLLRDVGE 241
M.leprae        KFGLSVAGSAAVAARRVVFATDNLRLVGLHSHIGSQIFDVGDFELAAHRVIGLLCDVGE 266
M.avium         KFGLSVAGSALAAVGRVFDTEHLRLVGLHSHIGSQIFDVGDFELAAARRVIGLLHDVEQ 266
:
A.thaliana      ---RQGFVSYLNIGGGLGDIDYHAGAVLPTPMDLINTVRELVLSRD-----LNLIIE 340
H.pylori        ---ALGIDLRFDFVGGGIGVSYENEETIK--LYDYAQGIILNALQGLD-----LTIICE 259
M.jannaschii    ---EEGIEIEDVNLGGGLGIPIYKDKQIP-TQKDLADAIINTMLKYKDKV--EMPNLILE 294
M.tuberculosis  FGPEKTAQIATVDLGGGLGISYLPDDPP-PIAELAAKLGTIVSDESTAVGLPTPKLVVE 300
M.leprae        FDPEKTAQLSIVDLGGGLGISYLPDDPP-PIFELAAKGAIVSNESAAGVLPVPKLMVE 325
M.avium         FGVEKTAQIATVDLGGGLGISYLAADPP-PMGELAGKLSAIVQHESAAGVLPTPRLVVE 325
:
A.thaliana      PGRSLIANTCCFVNHTGVKTNGT----KNFIVIDGSMaelIRPSLYDAYQHIELVSP 395
H.pylori        PGRSIVAESGELITQVLYEKKAQN----KRFVIVDAGMNDFLRPSLYHAKHAIRVITPS 314
M.jannaschii    PGRSLVATAGYLLGKVHHIKETPV----TKWVIDAGMNDMMRPAMYEAHHIINCKVK 349
M.tuberculosis  PGRAIAGPGTITLYEVGTVKDVVDSATAHRRYVSVDDGMSDNIRTALYGAQYDVRVLSRV 360
M.leprae        PGRAIAGPGTITLYEVGTIKDVVDSATAHRRYVSDGMSDNIRTALYDAQYDVRVLSRT 385
M.avium         PGRAIAGPGTITLYEVGTVKDVVDSATAHRRYVSDGMSDNIRTALYDAQYDARVLSRV 385
:
A.thaliana      PAEAEVTKFDVVGVPCESADFLGKDRELTPPQAGLVVHDAGAYCMSMASTYNLKMRP 454
H.pylori        -KGREISPCDVVGPCESSDTFLKDAHLP-ELEPGDKIAIEKVGAYGSSMASQYNSRPKL 372
M.jannaschii    ---NEKEVVSIAGGLCESSDVFGRDRELD-KVEVGDVLAIFDVGAYGISMANNYARGRP 405
M.tuberculosis  -SDAPPVPARLVGKHCESGDIIVRDTWVPDDIRPGDLVAATGAYCYSLSRYNMMVGRP 419
M.leprae        -SDAPAPASIVGKHCESGDIVVRDTWVPDDLKPDLVGAATGAYCYSLSRYNMLGRP 444
M.avium         -SDAPAELARIVGKHCESGDIVVRDTWVPGDLRPGDLIGVAATGAYCYSLSRYNMMVCRP 444
:
A.thaliana      PEYVVEEDGSITKIRHAETFDHDLRF----FEGLSGSGSPYDPVDYA 498
H.pylori        LELALEDH-KIRVIRKREALEDLWRLEEEGLKGVGSGSGSPYDPVDYA 419
M.jannaschii    -RMVLTSKKGVFLIRERETYADLIAKDIVPHLLGSGSGSPYDPVDYA 452
M.tuberculosis  AVVAVHAGNARLVLR-RETVDDLLSLEVR-----GSGSGSPYDPVDYA 461
M.leprae        AVVAVCAGQARLILR-RETVDDLLSLEVR-----GSGSGSPYDPVDYA 486
M.avium         AVVAVDRGARLVLR-RETVDDLLSLEVR-----GSGSGSPYDPVDYA 486
:

```

**Annotated DDC Sequences.** Active site residues are highlighted in Blue, disulphide-linked cysteines in Yellow. Carboxyl-terminal HA-tag in bold. Proteotypic DDC<sup>M.tub</sup> SRM peptides are underlined. Alignment performed with ClustalW2 (<http://www.ebi.ac.uk/Tools/msa/clustalw2/>).

```

>Leader                                >Catalytic Core
Lyr (WT)  MSLGIRYLALLPLFVITACQQPVNYPATQVAQVQPAIVNNSWIEISRSALDFNVKKVQ 60
Lyr (M37) -----MAIVNNSWIEISRSALDFNVKKVQ 24
Lyr (M37-KDEL) -----MAIVNNSWIEISRSALDFNVKKVQ 24
*****

Lyr (WT)  SLLGQSSSLCAVLKGDAYGHDLVAPIMIENNVCIGVTNNQELKEVRDLGFKGRLMRV 120
Lyr (M37) SLLGQSSSLCAVLKGDAYGHDLVAPIMIENNVCIGVTNNQELKEVRDLGFKGRLMRV 84
Lyr (M37-KDEL) SLLGQSSSLCAVLKGDAYGHDLVAPIMIENNVCIGVTNNQELKEVRDLGFKGRLMRV 84
*****

Lyr (WT)  RNATEQEMAQATNYNVEELIGDLDMAKRLDAIAKQONKVIPIHLALNSGGMSRNGLEVND 180
Lyr (M37) RNATEQEMAQATNYNVEELIGDLDMAKRLDAIAKQONKVIPIHLALNSGGMSRNGLEVND 144
Lyr (M37-KDEL) RNATEQEMAQATNYNVEELIGDLDMAKRLDAIAKQONKVIPIHLALNSGGMSRNGLEVND 144
*****

Lyr (WT)  KSGLEKAKQISQLANLKVVGIMSHYPEEDANKVREDLARFKQSQVLEVMGLERNNVTL 240
Lyr (M37) KSGLEKAKQISQLANLKVVGIMSHYPEEDANKVREDLARFKQSQVLEVMGLERNNVTL 204
Lyr (M37-KDEL) KSGLEKAKQISQLANLKVVGIMSHYPEEDANKVREDLARFKQSQVLEVMGLERNNVTL 204
*****

Lyr (WT)  HMANTFATITVPESWLDMVRVGGIFYGDTIASTDYKRVMTFKSNIASINYPKGNTVGYD 300
Lyr (M37) HMANTFATITVPESWLDMVRVGGIFYGDTIASTDYKRVMTFKSNIASINYPKGNTVGYD 264
Lyr (M37-KDEL) HMANTFATITVPESWLDMVRVGGIFYGDTIASTDYKRVMTFKSNIASINYPKGNTVGYD 264
*****

Lyr (WT)  RTYTLKRDSVLANIPVGYADGYRRVFSNAGHALIAGQRPVLGKTSMNNTVIVDITSLNNI 360
Lyr (M37) RTYTLKRDSVLANIPVGYADGYRRVFSNAGHALIAGQRPVLGKTSMNNTVIVDITSLNNI 324
Lyr (M37-KDEL) RTYTLKRDSVLANIPVGYADGYRRVFSNAGHALIAGQRPVLGKTSMNNTVIVDITSLNNI 324
*****

>HA-Tag
Lyr (WT)  KPGDEVVFFGKQGNSEITAEIEIDISGALFTEMSILWGATNQRVLVDGYPYDVPDYA--- 417
Lyr (M37) KPGDEVVFFGKQGNSEITAEIEIDISGALFTEMSILWGATNQRVLVDGYPYDVPDYA--- 381
Lyr (M37-KDEL) KPGDEVVFFGKQGNSEITAEIEIDISGALFTEMSILWGATNQRVLVDGYPYDVPDYAGSG 384
*****

Lyr (WT)  ----
Lyr (M37)  ----
Lyr (M37-KDEL) KDEL 388

```

**Annotated Lyr Sequences.** Leader sequence shown in green, catalytic core in blue, HA-tag in bold and KDEL in red. Proteotypic peptides used for Lyr<sup>M37-KDEL</sup> SRM are underlined. Catalytic site residues highlighted in yellow.

| Protein            | Sequence   | Product    | Light          |              | Heavy (SILAC)  |              | Heavy (CTAP)   |              |
|--------------------|------------|------------|----------------|--------------|----------------|--------------|----------------|--------------|
|                    |            |            | Precursor Mass | Product Mass | Precursor Mass | Product Mass | Precursor Mass | Product Mass |
| Lyr                | SALDFNVK   | y6         | 447.240        | 735.404      | 451.247        | 743.418      | 451.265        | 743.454      |
|                    |            | y5         |                | 622.320      |                | 630.334      |                | 630.370      |
|                    |            | y4         |                | 507.293      |                | 515.307      |                | 515.343      |
|                    |            | y3         |                | 360.224      |                | 368.238      |                | 368.274      |
|                    | SNIASINYPK | y8         | 635.327        | 955.488      | 639.334        | 963.503      | 639.352        | 963.539      |
|                    |            | y7         |                | 884.451      |                | 892.465      |                | 892.501      |
|                    |            | y6         |                | 797.419      |                | 805.433      |                | 805.469      |
|                    |            | y3         |                | 407.229      |                | 415.243      |                | 415.279      |
|                    | VPVLGK     | y5         | 306.708        | 513.340      | 310.715        | 521.354      | 310.733        | 521.390      |
|                    |            | y4         |                | 416.287      |                | 424.301      |                | 424.337      |
|                    |            | y3         |                | 317.218      |                | 325.233      |                | 325.269      |
|                    | DDC        | SVSELTAAVK | y8             | 502.785      | 818.462        | 506.792      | 826.476        | 506.810      |
| y7                 |            |            | 731.430        |              | 739.444        |              | 739.480        |              |
| y6                 |            |            | 602.387        |              | 610.401        |              | 610.437        |              |
| y5                 |            |            | 489.303        |              | 497.317        |              | 497.353        |              |
| DVVGEFGPEK         |            | y8         | 538.767        | 862.431      | 542.774        | 870.445      | 542.792        | 870.481      |
|                    |            | y7         |                | 763.362      |                | 771.376      |                | 771.412      |
|                    |            | y5         |                | 577.298      |                | 585.312      |                | 585.348      |
|                    |            | y4         |                | 430.230      |                | 438.244      |                | 438.280      |
| LGTIVSDESTAVGLPTPK |            | y13        | 892.986        | 1301.658     | 896.993        | 1309.673     | 897.011        | 1309.709     |
|                    |            | y7         |                | 711.440      |                | 719.454      |                | 719.490      |
|                    |            | y6         |                | 612.372      |                | 620.386      |                | 620.422      |
|                    |            | y4         |                | 442.266      |                | 450.280      |                | 450.316      |

**Supplementary Table 1 - Proteotypic Lyr and DDC Peptides For Selected Reaction Monitoring (SRM).**

Product ion values for isotopic variants of proteotypic Lyr and DDC peptides. Product ions used for relative quantification are highlighted in red. All precursors ions are doubly charged and all product ions are singly charged.

| Peptide               | Protein (Accession) | p-Site                           | Interrupted (H) vs. Interrupted (M) (Control) |             |             |          | Continuous (H) vs. Interrupted (M) |             |             |          |
|-----------------------|---------------------|----------------------------------|-----------------------------------------------|-------------|-------------|----------|------------------------------------|-------------|-------------|----------|
|                       |                     |                                  | H/M Rep. #1                                   | H/M Rep. #2 | H/M Rep. #3 | H/M Mean | H/M Rep. #1                        | H/M Rep. #2 | H/M Rep. #3 | H/M Mean |
| IASEGSEAEETPEAPK      | LARP7 (Q05CL8)      | Thr 251<br>Ser 253               | 0.962                                         | 0.999       | 0.985       | 0.98     | 9.467                              | -           | -           | 9.47     |
| IASDEEIQGTK           | PALLD (Q9ET54)      | Ser 901                          | 0.618                                         | -           | 0.815       | 0.72     | 7.455                              | -           | 6.139       | 6.80     |
| RLSSLRASTSK           | RS6 (P62754)        | Ser 235<br>Ser 236               | 1.918                                         | 0.640       | 2.097       | 1.55     | 7.26                               | 5.37        | 2.59        | 5.07     |
| SQSKSPTGTPAR          | TRA2A (Q6PFR5)      | Ser 16<br>Ser 18                 | 1.002                                         | -           | -           | 1.00     | -                                  | -           | 5.214       | 5.21     |
| RLSYNTASNK            | RL34 (Q9D1R9)       | Ser 12                           | 1.024                                         | -           | 0.891       | 0.96     | 6.685                              | -           | 2.970       | 4.83     |
| KRSISESSR             | PININ (O35691)      | Ser 698<br>Ser 700               | 0.722                                         | -           | -           | 0.72     | -                                  | -           | 4.758       | 4.76     |
| KRSEGLSLER            | HDGR2 (Q3UMU9)      | Ser 450                          | -                                             | -           | -           | -        | 4.417                              | -           | 4.573       | 4.50     |
| SGSSSPDSEITELK        | PYRG1 (P70698)      | Ser 573                          | -                                             | -           | -           | -        | -                                  | -           | 4.408       | 4.41     |
| SRLIPTIPESSTGTEDK     | SQSTM (Q64337)      | Thr 269<br>Thr 272               | 1.284                                         | -           | -           | 1.28     | 4.061                              | 4.726       | 3.439       | 4.08     |
| RSSDTCGSPALPSK        | AB1IP (Q8R5A3)      | Ser 532<br>Ser 537               | -                                             | -           | -           | -        | -                                  | -           | 3.308       | 3.31     |
| EPQSPSSQSTPCKPTNDR    | SPAT5 (Q3UMC0)      | Ser 244<br>Ser 247               | -                                             | -           | -           | -        | -                                  | -           | 3.178       | 3.18     |
| LENETLNK              | EIF4B (Q8BGD9)      | Ser 445                          | -                                             | 1.085       | 1.250       | 1.17     | 2.364                              | 3.211       | 2.137       | 2.57     |
| SSPNVANQPPSPGGK       | AFAD (Q9QZQ1)       | Ser 1182                         | -                                             | -           | -           | -        | -                                  | -           | 2.290       | 2.29     |
| GQLHGSSDESEVENEAK     | UTP18 (Q5SSI6)      | Ser 115                          | -                                             | 1.069       | -           | 1.07     | 2.572                              | 1.981       | -           | 2.28     |
| SRPLNAVSDQDGK         | YBOX3 (Q9JKB3)      | Ser 328                          | 1.076                                         | -           | 1.214       | 1.15     | 1.99                               | -           | 2.047       | 2.02     |
| SYSYPDGKESPSDK        | MATR3 (Q8K310)      | Ser 598<br>Ser 604               | 0.775                                         | -           | 0.842       | 0.81     | 0.366                              | -           | 0.624       | 0.50     |
| AEDGAAPSPSSEIPK       | MARCS (P26645)      | Thr 143                          | 1.184                                         | -           | 0.920       | 1.05     | -                                  | -           | 0.487       | 0.49     |
| TVTPASSAKTSPAK        | DPYL2 (O08553)      | Thr 521<br>Ser 522               | 0.912                                         | -           | 0.952       | 0.93     | 0.365                              | 0.670       | 0.396       | 0.48     |
| IASPPPPPK             | SRRM1 (Q52K18)      | Thr 633<br>Ser 635               | 0.958                                         | 1.084       | 0.959       | 1.00     | 0.363                              | -           | -           | 0.36     |
| VQSEGEKLSPKSDISLIPR   | MAP1B (P14873)      | Ser 1768<br>Ser 1778<br>Thr 1784 | 0.803                                         | 0.773       | 0.762       | 0.78     | 0.591                              | 0.135       | -           | 0.36     |
| SVSASHEGDVK           | LBR (Q3U9G9)        | Ser 101<br>Ser 103               | 0.942                                         | -           | -           | 0.94     | -                                  | 0.338       | -           | 0.34     |
| TQESCGIAPLIPSQSPKPEAR | HS12B (Q9CZJ2)      | Thr 42                           | -                                             | -           | -           | -        | -                                  | 0.015       | -           | 0.02     |

**Supplementary Table 2 - Regulated Cell-Specific Phosphopeptides.** Regulated cell-specific phosphopeptides from “Interrupted” MDA-MB-231 +DDC<sup>M.tub-KDEL</sup> “Light” / C3 +Lyr<sup>M37-KDEL</sup> “Medium” co-cultures and “Continuous” MDA-MB-231 +DDC<sup>M.tub-KDEL</sup> “Light” / C3 +Lyr<sup>M37-KDEL</sup> “Heavy” 5-day co-cultures ( $n = 3$ ). Results from Control “Interrupted” MDA-MB-231 +DDC<sup>M.tub-KDEL</sup> “Light” / C3 +Lyr<sup>M37-KDEL</sup> “Medium” and “Interrupted” MDA-MB-231 +DDC<sup>M.tub-KDEL</sup> “Light” / C3 +Lyr<sup>M37-KDEL</sup> “Heavy” 5-day co-cultures are shown for comparison ( $n = 3$ ). All regulated phosphopeptides are from C3 +Lyr<sup>M37-KDEL</sup> cells. Phosphorylated residues are underlined and bold. “Up-regulated” phosphopeptides = Heavy / Medium  $\geq 2$  (green) and “down-regulated” phosphopeptides = Heavy / Medium  $\leq 0.5$  (magenta).

# Supplementary Figure 1

**a**

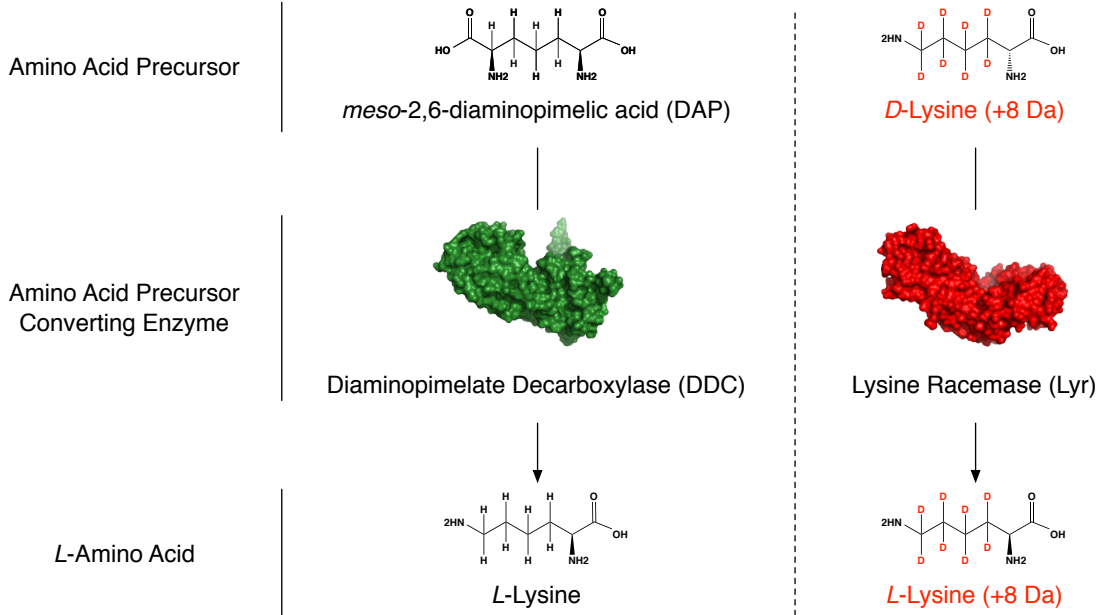

**b**

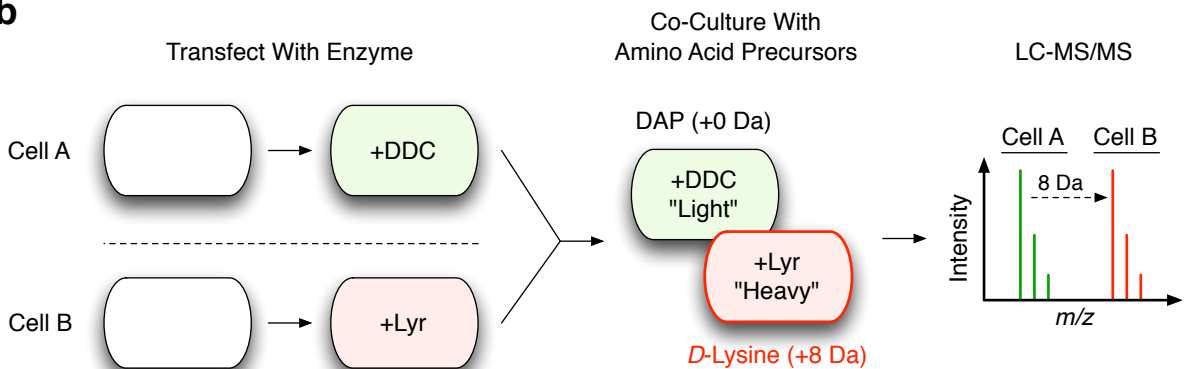

**c**

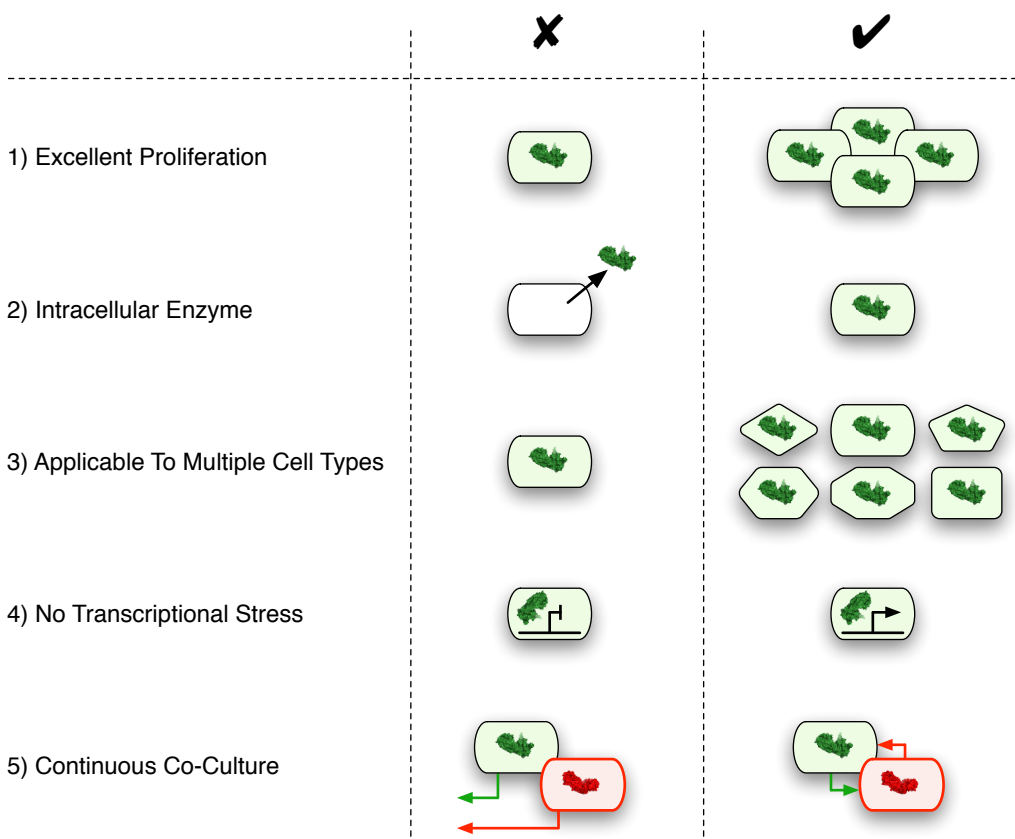



# Supplementary Figure 2

a

Monomer

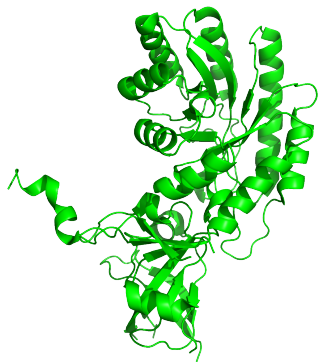

*Helicobacter pylori*

Non-Covalent Homodimer

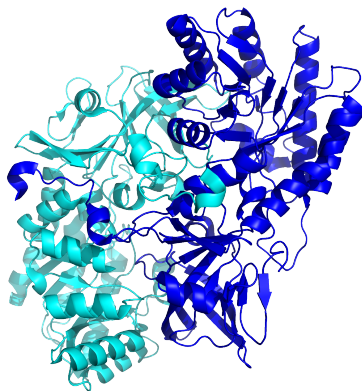

*Methanocaldococcus jannaschii*

Covalent Homodimer

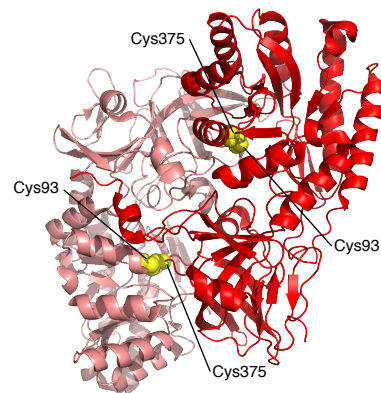

*Mycobacterium tuberculosis*

b

Active-Site Loop  
"Closed-Helix"

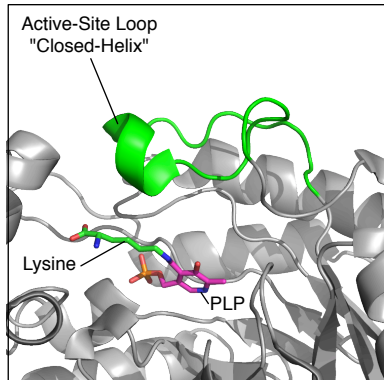

*Helicobacter pylori*

Active-Site Loop  
"Open-Helix"

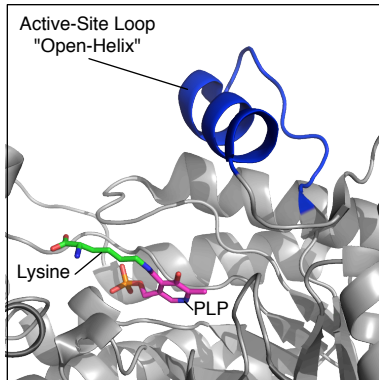

*Methanocaldococcus jannaschii*

Active-Site Loop  
"Closed-Sheet"

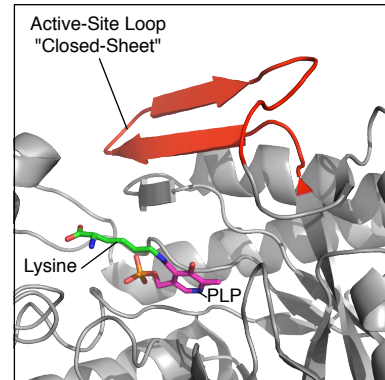

*Mycobacterium tuberculosis*

# Supplementary Figure 3

**a**

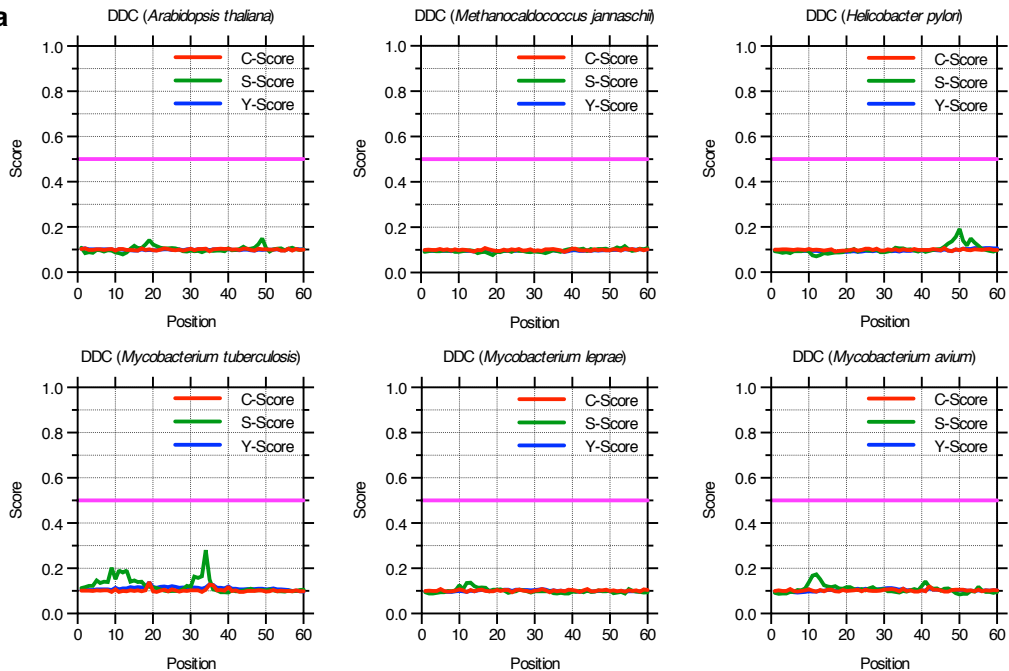

**b**

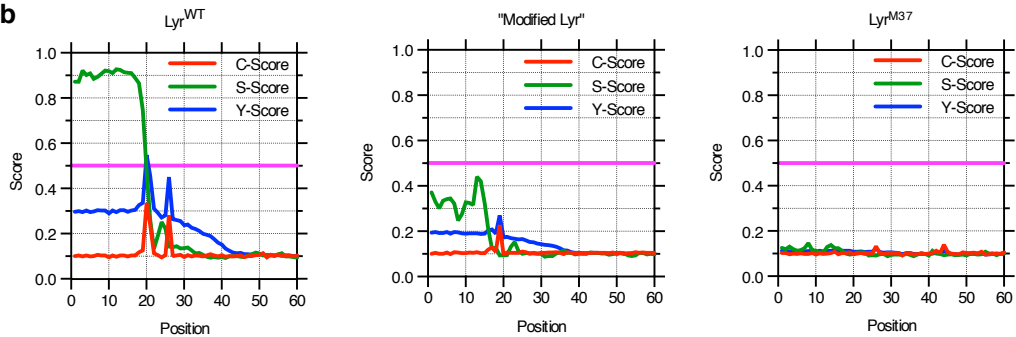

# Supplementary Figure 4

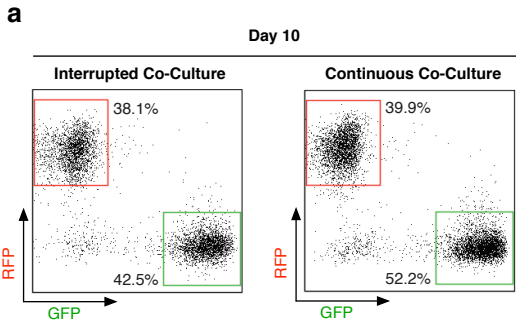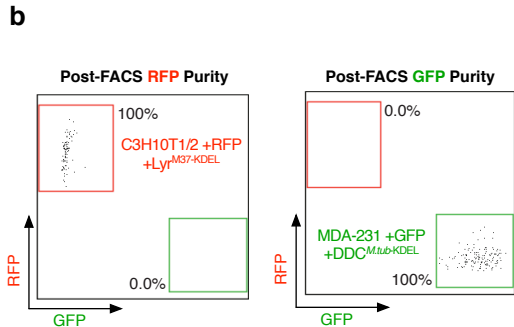

# Supplementary Figure 5

a

## Proteotypic Lyr Peptides

C3 + Empty Vec.

C3 + Lyr<sup>M37-KDEL</sup>

C3 + DDC<sup>M.tub-KDEL</sup>

SALDFNVK

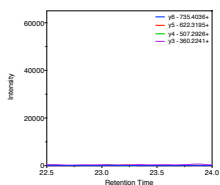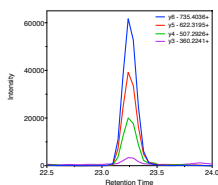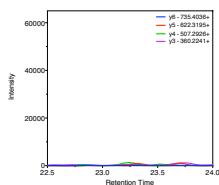

SNIASINYPK

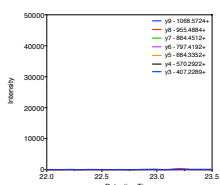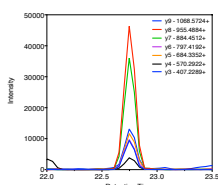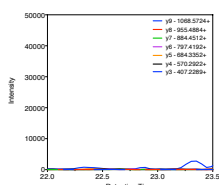

VPVLGK

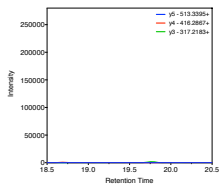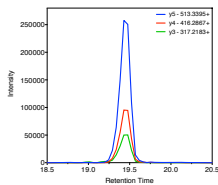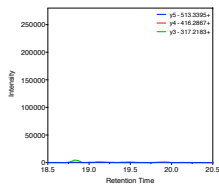

b

## Proteotypic DDC Peptides

C3 + Empty Vec.

C3 + Lyr<sup>M37-KDEL</sup>

C3 + DDC<sup>M.tub-KDEL</sup>

SVSELTAAVK

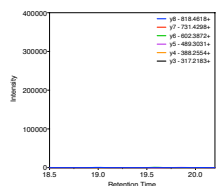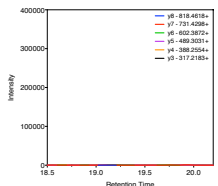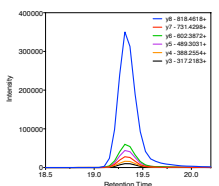

LGTIVDESTAVGLPTPK

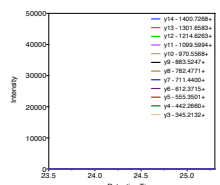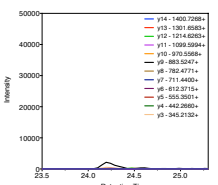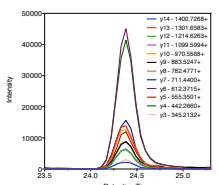

DWVGFGEPEK

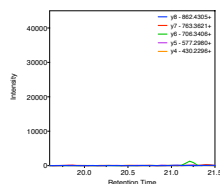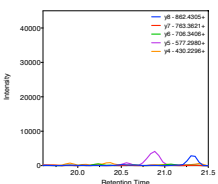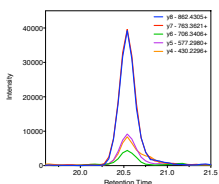

Supplement: supp_O113.037119_mcp.O113.037119-1.pdf [file supp_O113.037119_mcp.O113.037119-1.pdf]
